# Supplementary material
Source: PubMed Central journal article supplement (PMC5155442)

# Supplement Figure S1

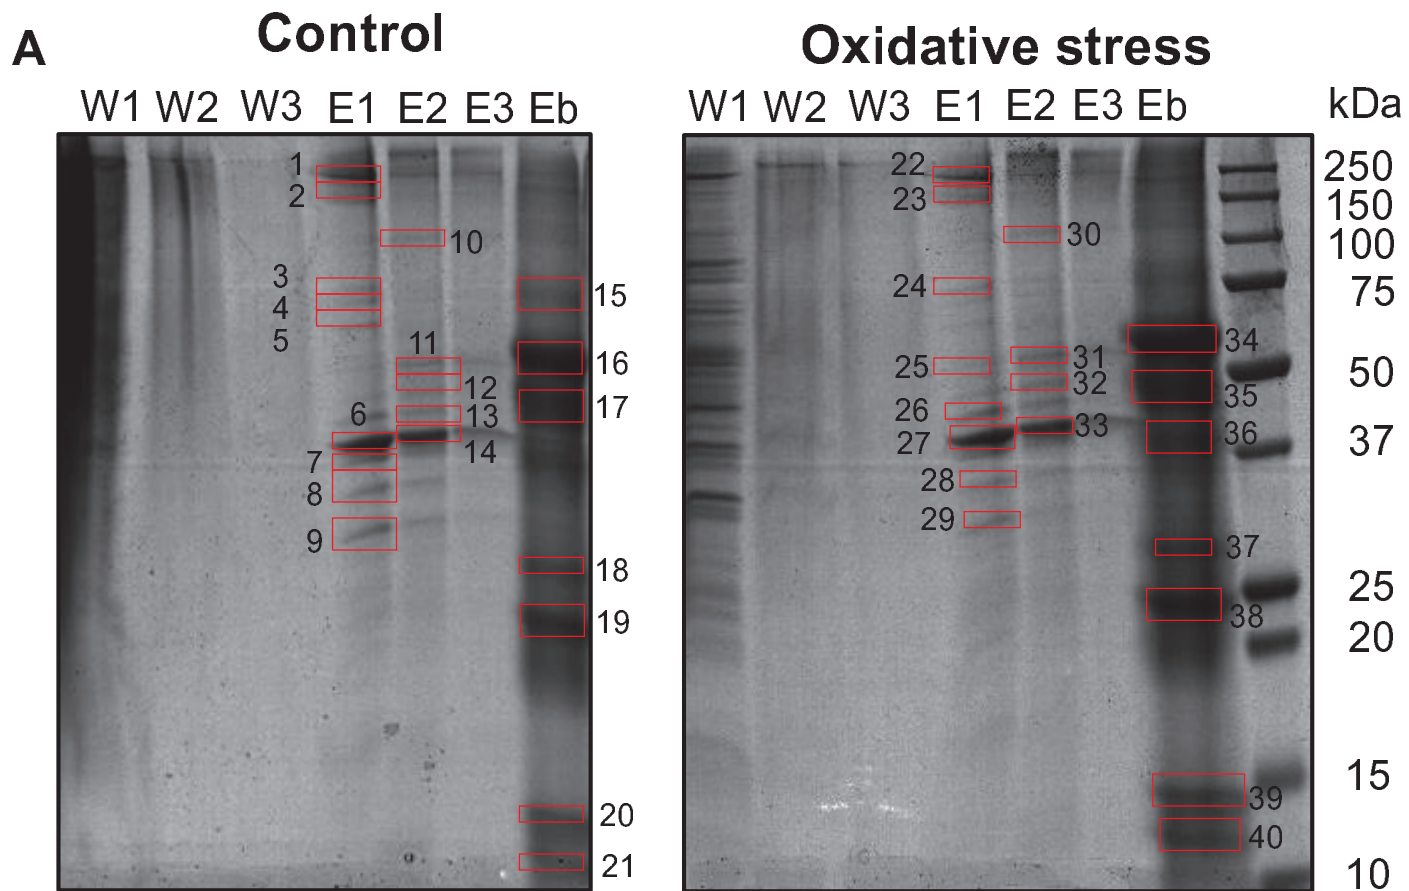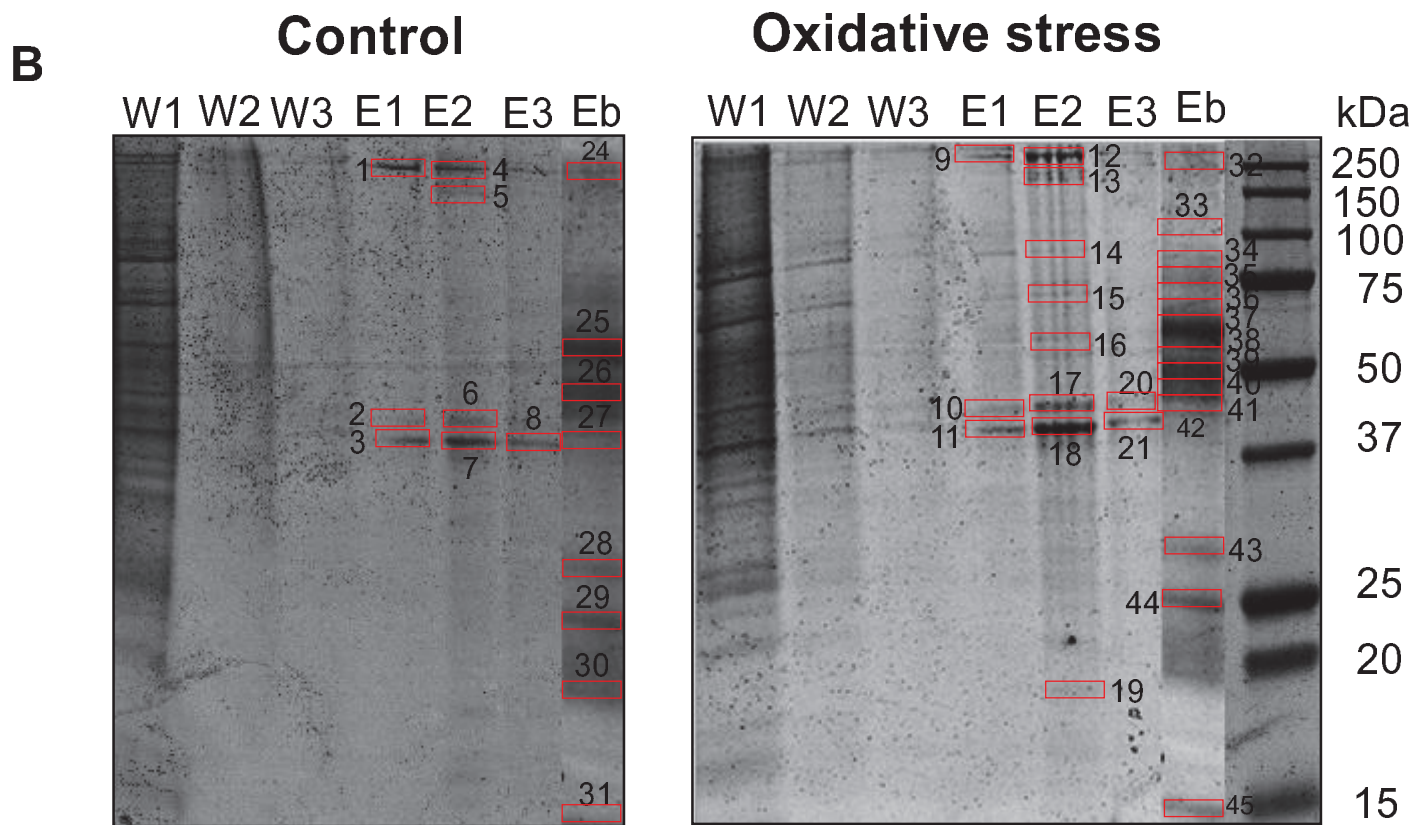

Supplement: NIHMS833472-supplement-Supplemental_Figure.pdf [file NIHMS833472-supplement-Supplemental_Figure.pdf]
